# Supplementary material for: Canagliflozin mediates tumor suppression alone and in combination with radiotherapy in non‐small cell lung cancer (NSCLC) through inhibition of HIF‐1α
Source: PubMed Central journal article supplement (PMC10620129; doi:10.1002/1878-0261.13508), 2023-08-27
Supplement: MOL2-17-2235-s001.pdf [file MOL2-17-2235-s001.pdf]

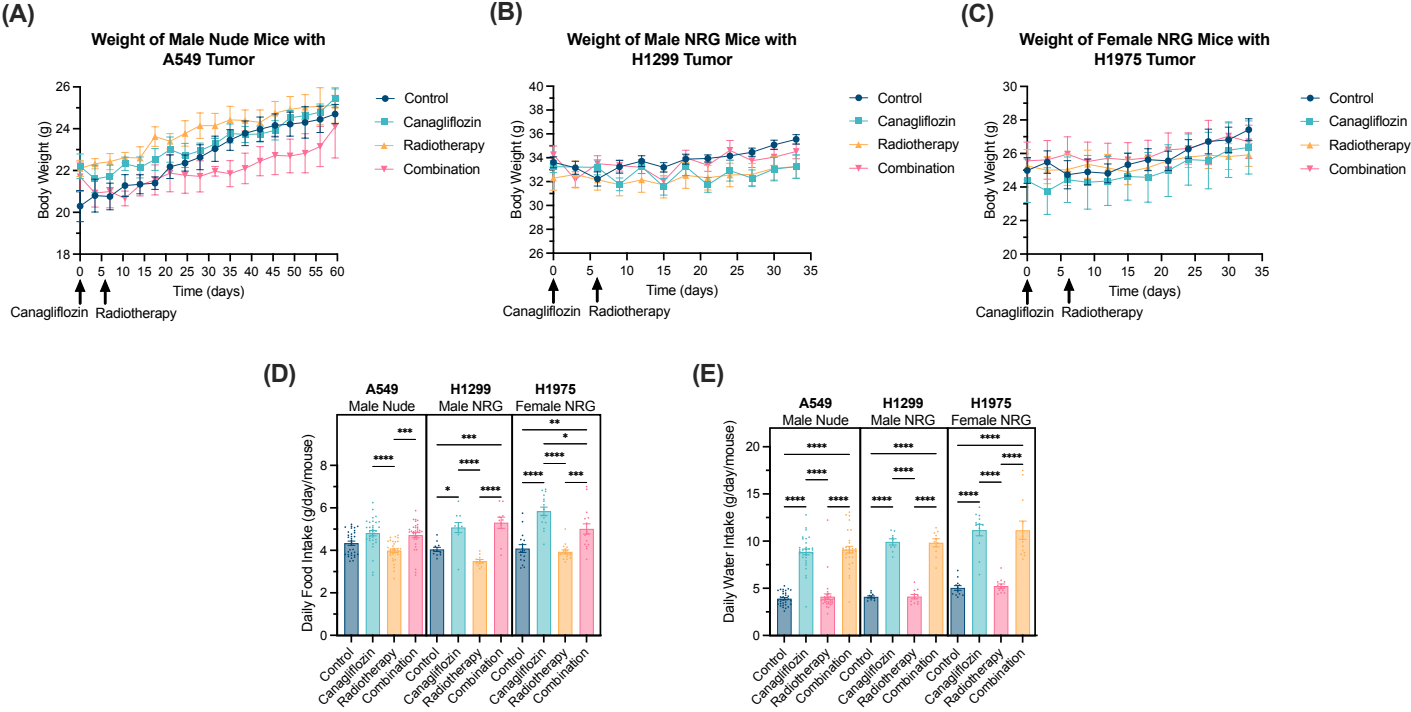

**Supplementary Figure 1. Body weight and food and water intake of mice bearing non-small cell lung cancer (NSCLC) tumors.** Total body weight of (A) male BALB/c nude mice with A549 tumors ( $n=4-5$ /group), (B) male NRG mice with H1299 tumors ( $n=5$ /group) and (C) female NRG mice with H1975 tumors ( $n=5$ /group) treated with vehicle control, canagliflozin, RT (5Gy) or a combination treatment. (D) Diet and (E) water were weighed 2–3 times per week to estimate the daily consumption by the animals. Data are presented as mean  $\pm$  SEM. (A–C) Two-way repeated measures ANOVA or (D, E) ordinary one-way ANOVA followed by Tukey’s multiple comparisons test was used. \* $p<0.05$ , \*\* $p<0.01$ , \*\*\* $p<0.001$ , \*\*\*\* $p<0.0001$ .

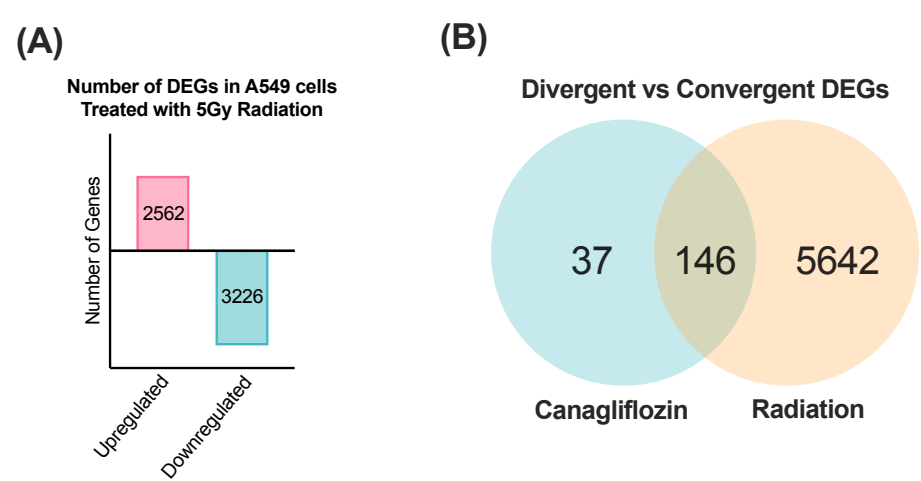

**Supplementary Figure 2. Bioinformatics analysis of differentially expressed genes (DEGs) in A549 non-small cell lung cancer (NSCLC) cells treated with canagliflozin or radiotherapy (RT).** RNA-sequencing (seq) was used to provide insight into the transcriptome of A549 cells treated with 10 $\mu$ M canagliflozin or 5Gy for 24h ( $n=3$ ). (A) The number of significantly upregulated and downregulated DEGs in A549 cells following RT (5Gy) with a False Discovery Rate (FDR)  $q$ -value  $<0.05$ . (B) A Venn diagram illustrating the number of divergent and convergent DEGs by canagliflozin (10 $\mu$ M) vs. RT (5Gy) (FDR  $q$ -value  $<0.05$ ).

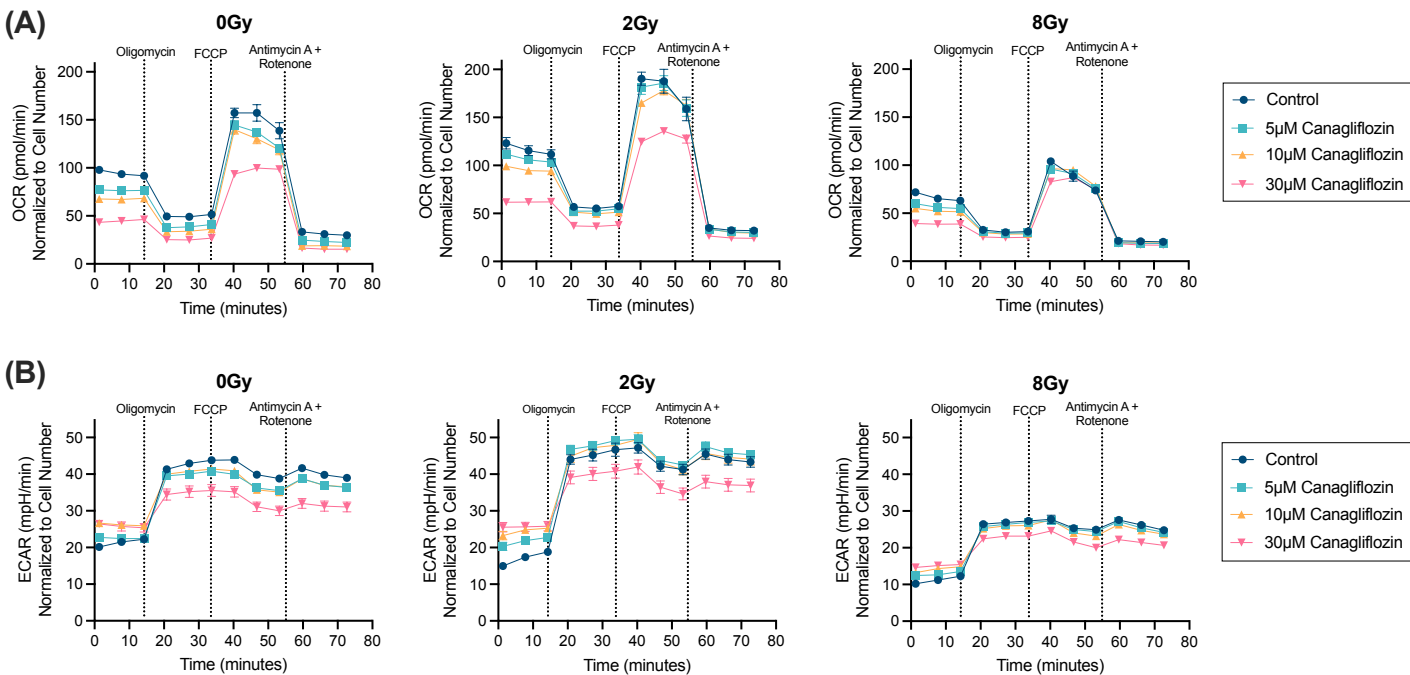

**Supplementary Figure 3. Effects of canagliflozin and radiotherapy (RT) on mitochondrial respiration in A549 non-small cell lung cancer (NSCLC) cells.** A549 cells were pre-treated for 5h with the indicated canagliflozin (5–30 $\mu$ M) doses prior to RT (single fraction of 2 or 8Gy) and **(A)** oxygen consumption rate (OCR) and **(B)** extracellular acidification rate (ECAR) were measured with the Seahorse Mito Stress Test 48h later.

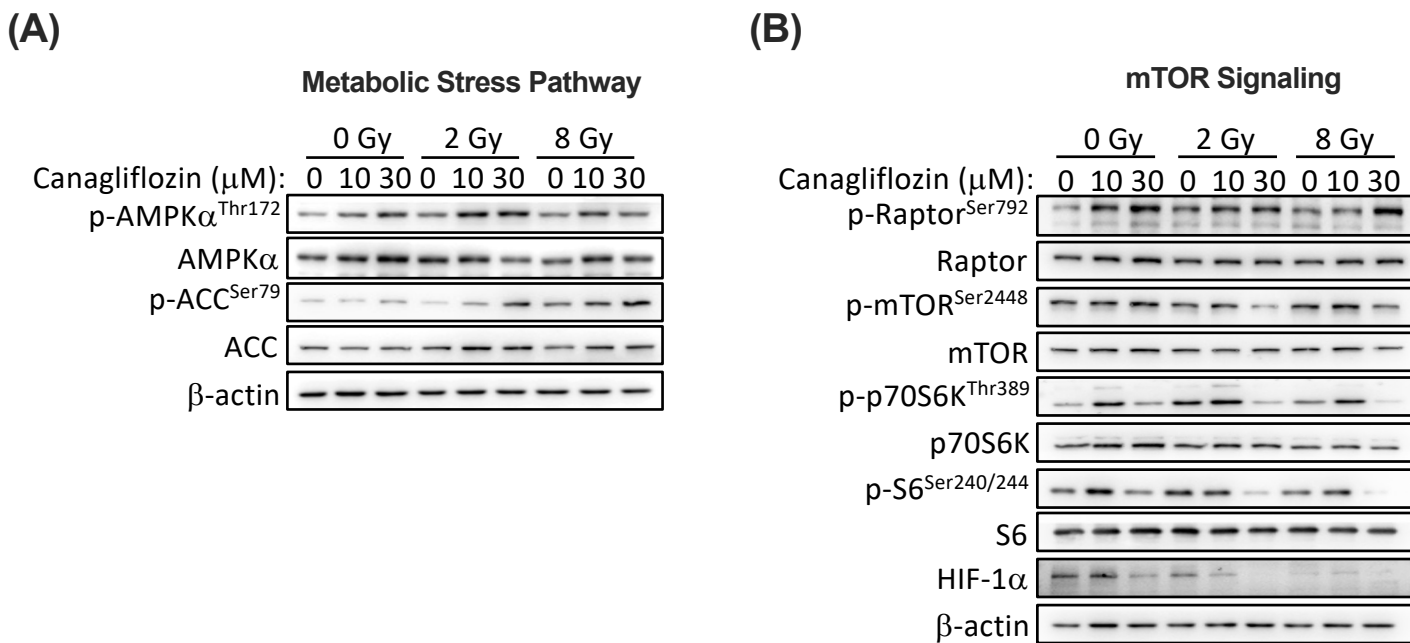

**Supplementary Figure 4. Regulation of metabolic pathways by canagliflozin and radiotherapy (RT) in H1299 non-small cell lung cancer (NSCLC) cells.** Representative protein immunoblots of H1299 cells pre-treated with canagliflozin (10 or 30 $\mu$ M) for 5h followed by RT (2 or 8Gy) and probed for markers in the **(A)** metabolic stress and **(B)** mTOR signaling pathways 48h post-RT.

**(A)**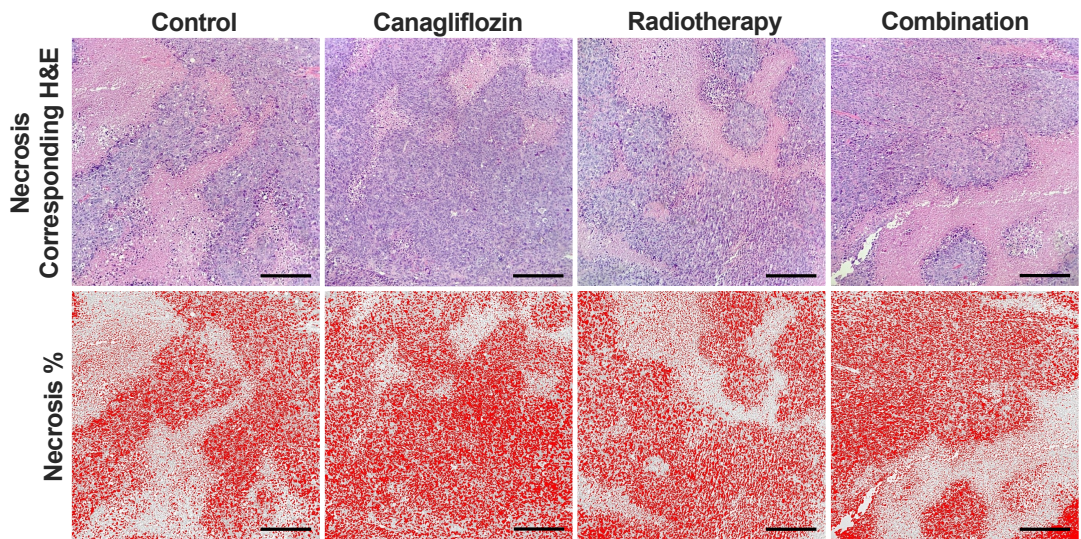**(B)**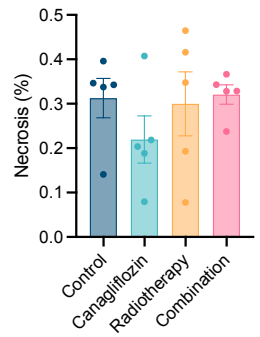

**Supplementary Figure 5. Assessment of necrosis in H1299 non-small cell lung cancer (NSCLC) tumors. (A)**

Representative H&E images (top row) of H1299 tumors ( $n=5/\text{group}$ ) that were treated with vehicle control, canagliflozin, radiotherapy or combination therapy and the necrosis percentage images (second row) were generated using ImageJ (scale bar= $400\mu\text{m}$ ). Red indicates the viable areas, while the pale color represents necrotic areas. **(B)** Quantification of the whole tumor section was determined following the ImageJ User Guide for tissue quantification. Necrotic Area = Total Area – Viable Tissue Area; Necrotic Tissue Percentage = Necrotic Area/Total Area. Data are presented as mean  $\pm$  SEM. Ordinary one-way ANOVA **(B)** was used to detect statistical significance.

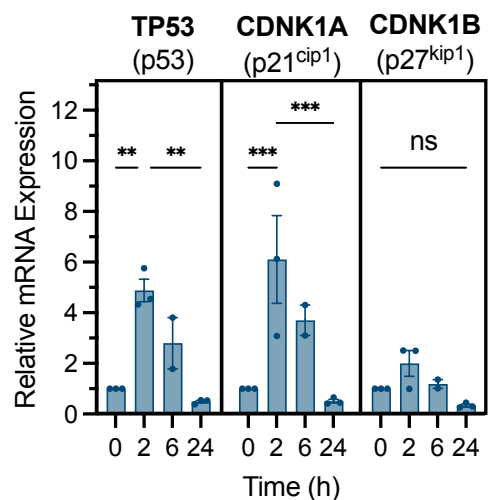

**Supplementary Figure 6. Analysis of cell cycle regulation genes in A549 non-small cell lung cancer (NSCLC) cells treated with canagliflozin.**

Relative mRNA expression, determined with RT-qPCR, of cell cycle regulation genes in A549 cells treated with canagliflozin ( $30\mu\text{M}$ ) for 0, 2, 6 and 24h. Data were obtained from three independent experiments and presented as mean  $\pm$  SEM. Ordinary one-way ANOVA followed by Tukey's multiple comparisons test was used to detect statistical significance. ns: non-significant, \*\* $p<0.01$ , \*\*\* $p<0.001$ .

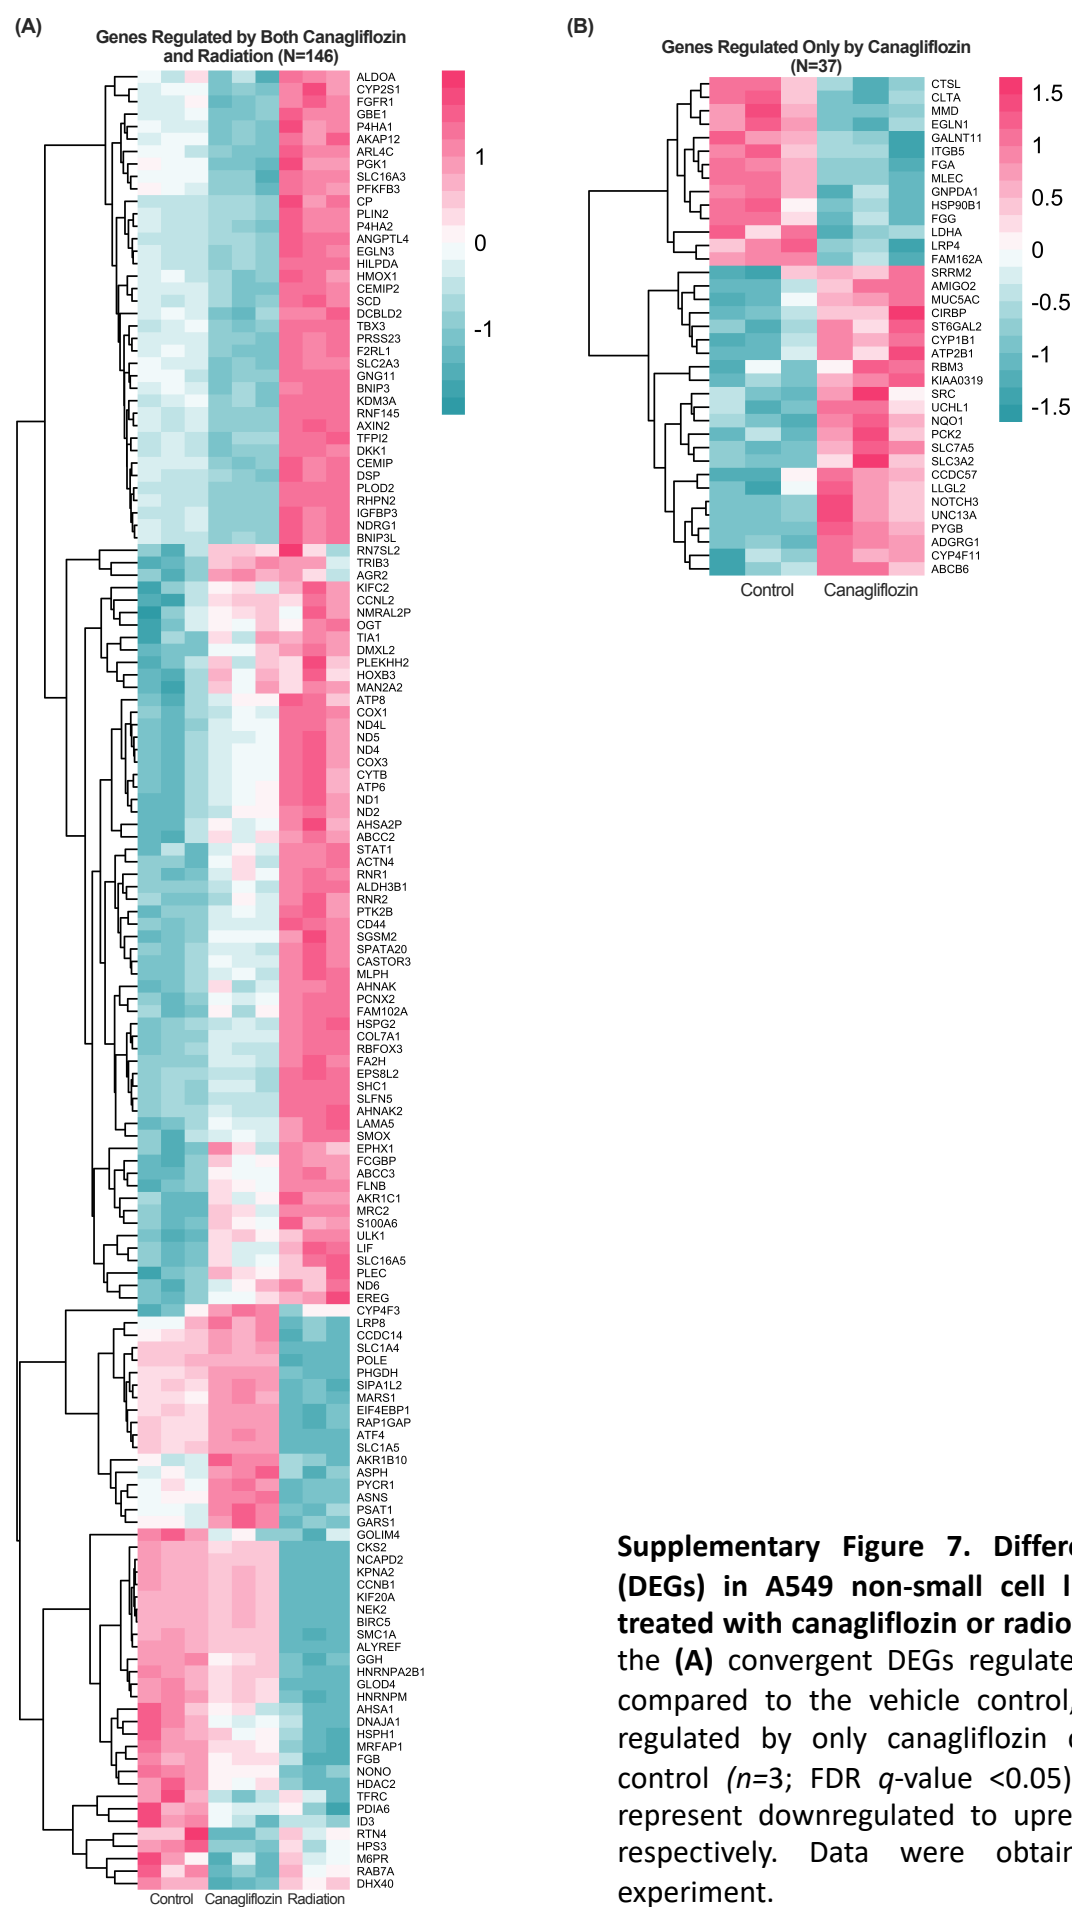

**Supplementary Figure 7. Differentially expressed genes (DEGs) in A549 non-small cell lung cancer (NSCLC) cells treated with canagliflozin or radiotherapy (RT).** Heatmaps of the **(A)** convergent DEGs regulated by canagliflozin and RT compared to the vehicle control, and **(B)** divergent DEGs regulated by only canagliflozin compared to the vehicle control ( $n=3$ ; FDR  $q$ -value  $<0.05$ ). The teal to pink scales represent downregulated to upregulated from -1.5 to 1.5, respectively. Data were obtained from the RNA-seq experiment.

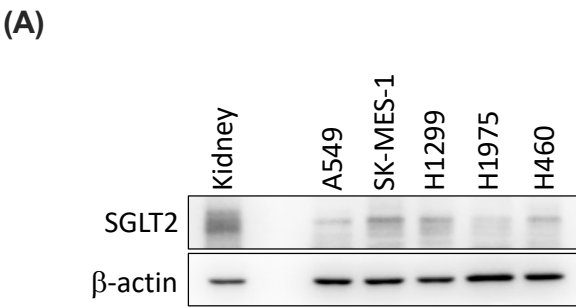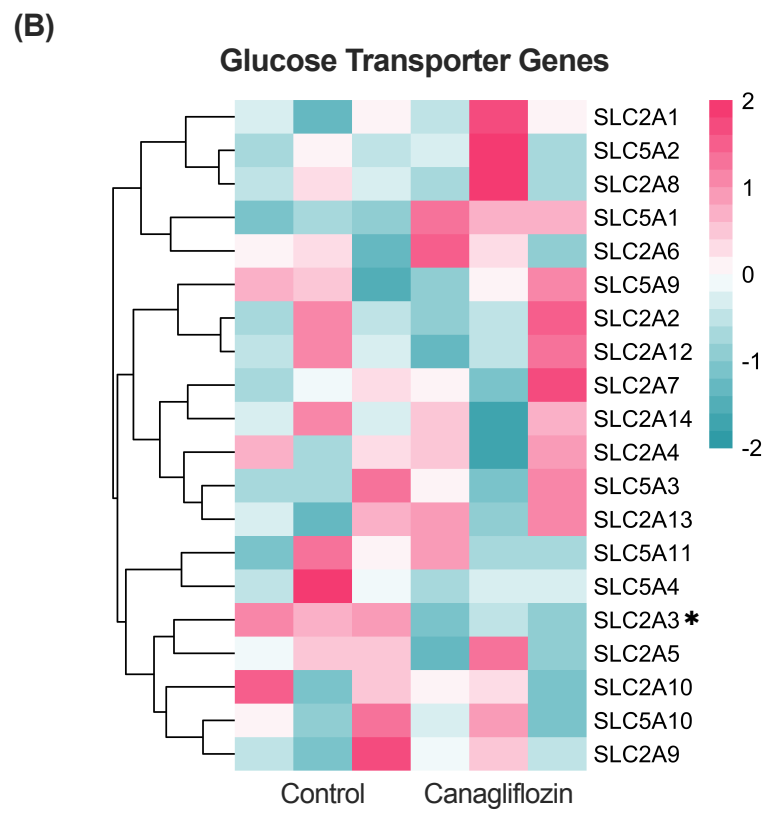

**Supplementary Figure 8. Expression of glucose transporters in non-small cell lung cancer (NSCLC) cells.** **(A)** Representative protein immunoblot of the sodium-glucose cotransporter 2 (SGLT2) in mouse kidney (positive control) and human A549, SK-MES-1, H1299, H1975 and H460 NSCLC cells. **(B)** A heatmap of glucose transporter genes from the RNA-seq data in A549 cells (control vs. canagliflozin). A 24h treatment with 10 $\mu$ M canagliflozin significantly regulated one glucose transporter (*SLC2A3*) as indicated by an asterisk (\*) (false discovery rate (FDR)  $q$ -value <0.05).

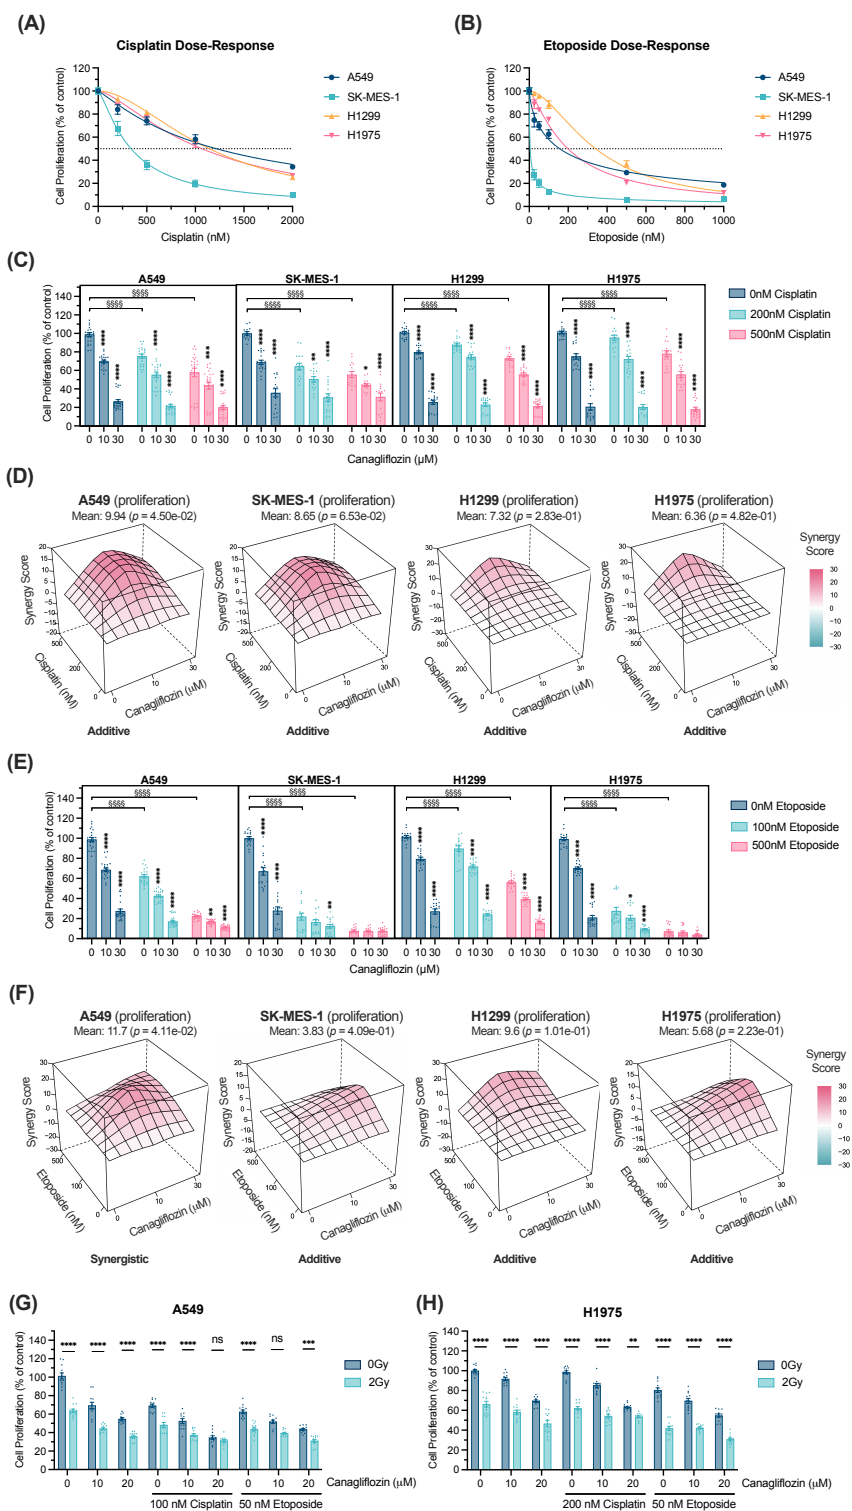

**Supplementary Figure 9. Proliferation assay of human non-small cell lung cancer (NSCLC) cells treated with canagliflozin, chemotherapy and/or radiotherapy (RT).** Proliferation assay of human NSCLC cells (A549, SK-MES-1, H1299 and H1975) treated with **(A)** cisplatin (200–2000nM), **(B)** etoposide (50–1000nM) or **(C, E)** a combination treatment concurrently with canagliflozin (10 or 30 $\mu\text{M}$ ) for 5 days. **(D, F)** Proliferation assay results were subjected to synergy analysis using Highest Single Agent (HSA) modeling where a mean HSA synergy score of < -10 suggests antagonism, -10–10 suggests additivity and > 10 suggests synergism. Proliferation assay with **(G)** A549 and **(H)** H1975 cells treated with the indicated doses of canagliflozin (10 or 20 $\mu\text{M}$ ), cisplatin (100 or 200nM), etoposide (50nM) and/or RT (single fraction of 2Gy). Drug treatments were administered concurrently 5h prior to RT. Results were derived from three independent experiments and presented as mean  $\pm$  SEM. Data were calculated using two-way ANOVA **(C, E, G, H)** followed by Tukey's multiple comparisons test. ns: non-significant, \* $p$ <0.05, \*\* $p$ <0.01, \*\*\*/\$\$\$\$ $p$ <0.001, \*\*\*\*/\$\$\$\$ $p$ <0.0001.

**Supplementary Table 1. List of antibodies and PCR probes used.** Antibodies were purchased from New England Biolabs (Ipswich, MA), Proteintech (Sankt Leon-Rot, Germany) or Vector Laboratories Inc (Burlingame, CA) and PCR probes were purchased from Life Technologies Inc (Carlsbad, CA).

| <b>Antibody or Probe</b>                             | <b>Catalog Number</b>      | <b>Dilution (WB)</b> | <b>Dilution (IHC)</b> | <b>Manufacturer</b>           |
|------------------------------------------------------|----------------------------|----------------------|-----------------------|-------------------------------|
| AMPK $\alpha$                                        | 2532                       | 1:1000               |                       | NEB                           |
| p-AMPK $\alpha$ (Thr172)                             | 2531                       | 1:1000               |                       | NEB                           |
| ACC                                                  | 3662                       | 1:1000               |                       | NEB                           |
| p-ACC (Ser79)                                        | 11818                      | 1:1000               | 1:200                 | NEB                           |
| Raptor                                               | 2280                       | 1:1000               |                       | NEB                           |
| p-Raptor (Ser792)                                    | 2083                       | 1:1000               |                       | NEB                           |
| mTOR                                                 | 2983                       | 1:1000               |                       | NEB                           |
| p-mTOR (Ser2448)                                     | 2971                       | 1:1000               |                       | NEB                           |
| p70S6K                                               | 9202                       | 1:1000               |                       | NEB                           |
| p-p70S6K (Thr389)                                    | 9205                       | 1:1000               |                       | NEB                           |
| S6                                                   | 2217                       | 1:1000               |                       | NEB                           |
| p-S6 (Ser240/244)                                    | 2215                       | 1:1000               |                       | NEB                           |
| 4EBP1                                                | 9644                       | 1:1000               |                       | NEB                           |
| p-4EBP1 (Ser65)                                      | 9451                       | 1:1000               |                       | NEB                           |
| HIF-1 $\alpha$                                       | 36169                      | 1:1000               |                       | NEB                           |
| H3                                                   | 4499                       | 1:1000               |                       | NEB                           |
| p-H3 (Ser10)                                         | 53348                      | 1:1000               |                       | NEB                           |
| p21cip1                                              | 2947                       | 1:1000               |                       | NEB                           |
| p27kip1                                              | 3688                       | 1:1000               |                       | NEB                           |
| HDAC2                                                | 57156                      | 1:1000               |                       | NEB                           |
| $\beta$ -actin                                       | 5125                       | 1:1000               |                       | NEB                           |
| SGLT2                                                | 24654-1-AP                 | 1:1000               |                       | Proteintech                   |
| CC3 (Asp175)                                         | 9661                       |                      | 1:400                 | NEB                           |
| Anti-Rabbit IgG,<br>HRP-linked<br>secondary antibody | 7074                       | 1:10000              |                       | NEB                           |
| Goat anti-Rabbit<br>IgG (H+L),<br>Biotinylated       | BA-1000                    |                      | 1:500                 | Vector<br>Laboratories<br>Inc |
| TP53 (p53)                                           | 4331182<br>(Hs01034249_m1) |                      |                       | Life<br>Technologies<br>Inc   |
| CDKN1A (p21cip1)                                     | 4331182<br>(Hs00355782_m1) |                      |                       | Life<br>Technologies<br>Inc   |
| CDKN1B (p27kip1)                                     | 4331182<br>(Hs00153277_m1) |                      |                       | Life<br>Technologies<br>Inc   |
| GAPDH                                                | 4331182<br>(Hs02786624_g1) |                      |                       | Life<br>Technologies<br>Inc   |
